# Supplementary material
Source: Springer Nature journal article supplement (https://www.springermedizin.de/resource/supplementary/12963_2011_154_MOESM4_ESM.pdf/9572774)
Supplement: MOESM4 [file 9572774]

Verbal autopsies  
to be reviewed

Single Review  
90%

Double Review  
10%

*BLINDED*  
100% of these  
reviewed with HCE  
blinded

*COMPLETE*  
50% of these  
reviewed by a  
different physician  
with HCE included

*BLINDED*  
100% of these  
reviewed by 2  
different physicians  
with HCE blinded

*COMPLETE*  
50% of these  
reviewed by 2  
different physicians  
with HCE included

*Test for Cross-Cultural Reliability*

A different 10% of the total set of verbal autopsies were additionally sent to other sites for single review.  
*100% of these reviewed with HCE blinded, 50% reviewed by another physician with HCE included.*
